# Supplementary material for: Impacts of Source Regions and Atmospheric Transport on Physical Properties of Black Carbon and Tracer Ratios over the Yellow Sea: Evidence from Multi-Seasonal Airborne Observations
Source: Copernicus journal article supplement (doi:10.5194/egusphere-2025-3403), 2025-08-07
Supplement: Supplementary file 1 [file egusphere-2025-3403-supplement.pdf]

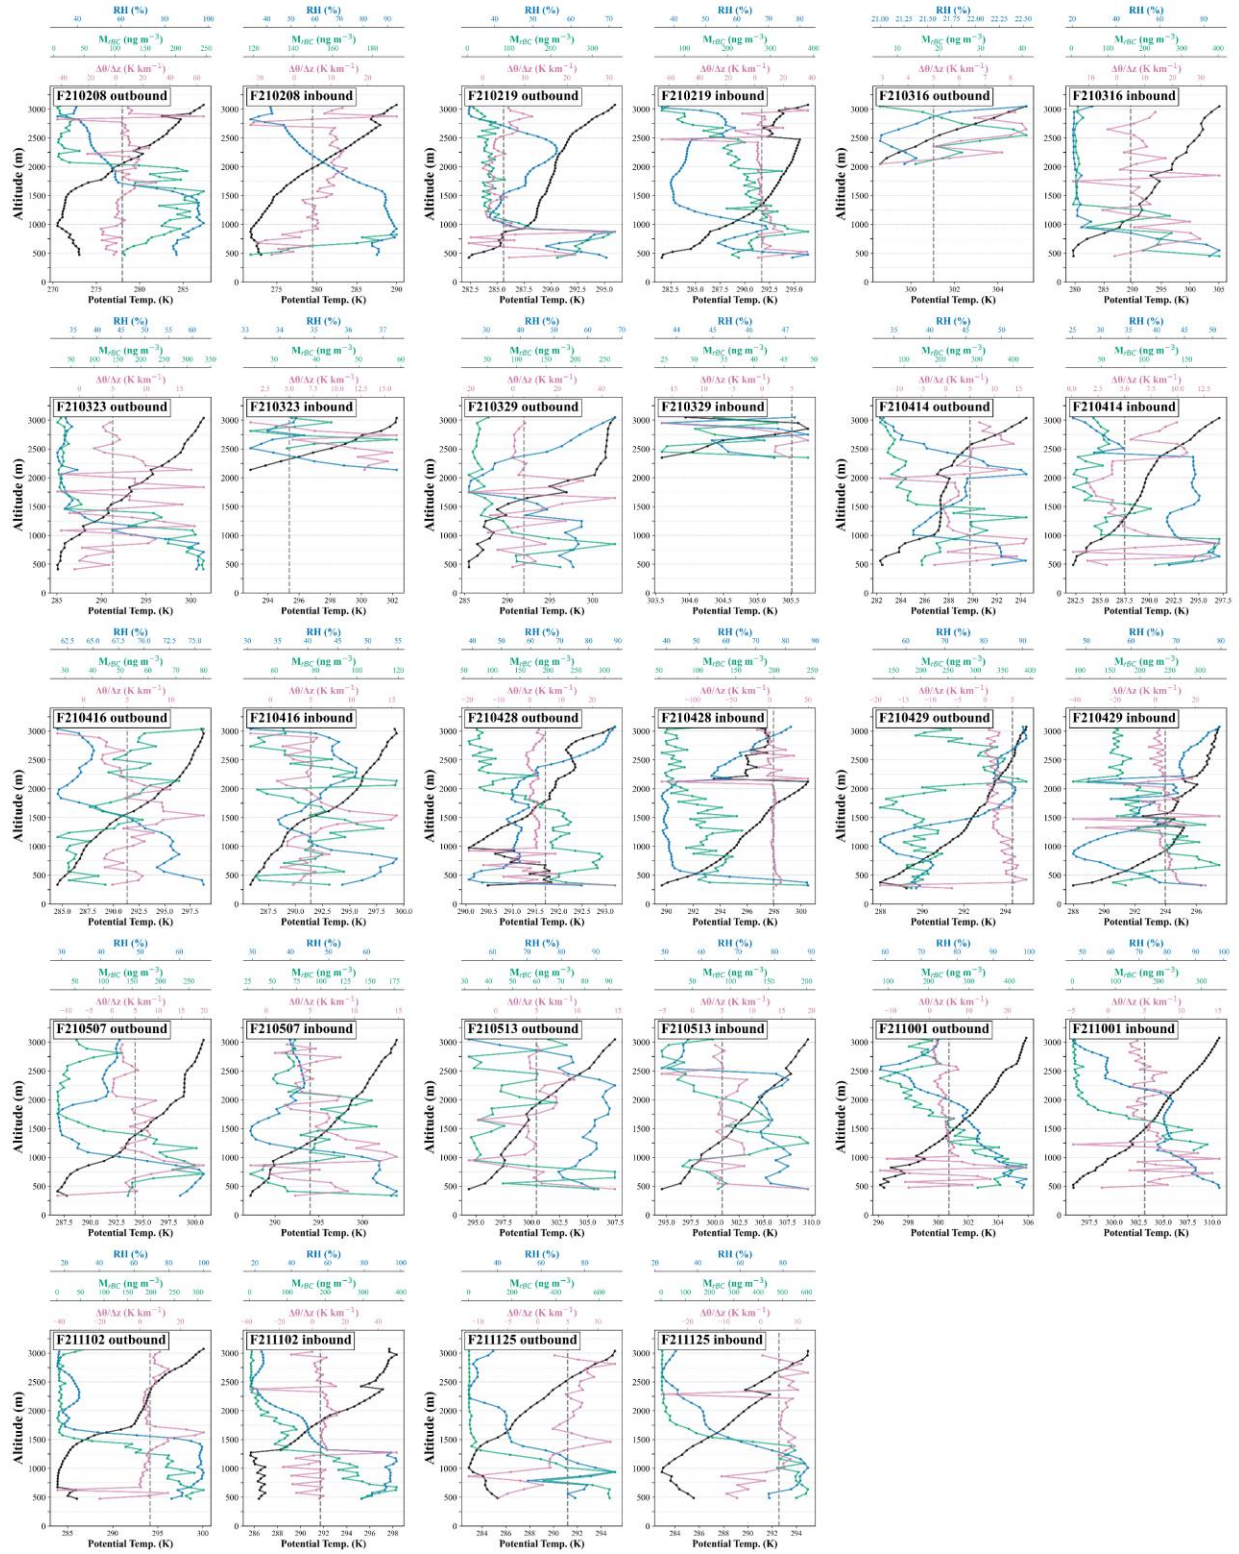

**Figure S1.** Vertical profiles of the vertical gradient of potential temperature ( $\Delta\theta/\Delta z$ ) [ $\text{K km}^{-1}$ ], Relative Humidity [%], Wind speed [ $\text{m s}^{-1}$ ], rBC mass concentration ( $M_{rBC}$ ) [ $\text{ng m}^{-3}$ ] for each flight during 2021. The vertical dotted black line shows  $\Delta\theta/\Delta z = 5 \text{ K km}^{-1}$ .

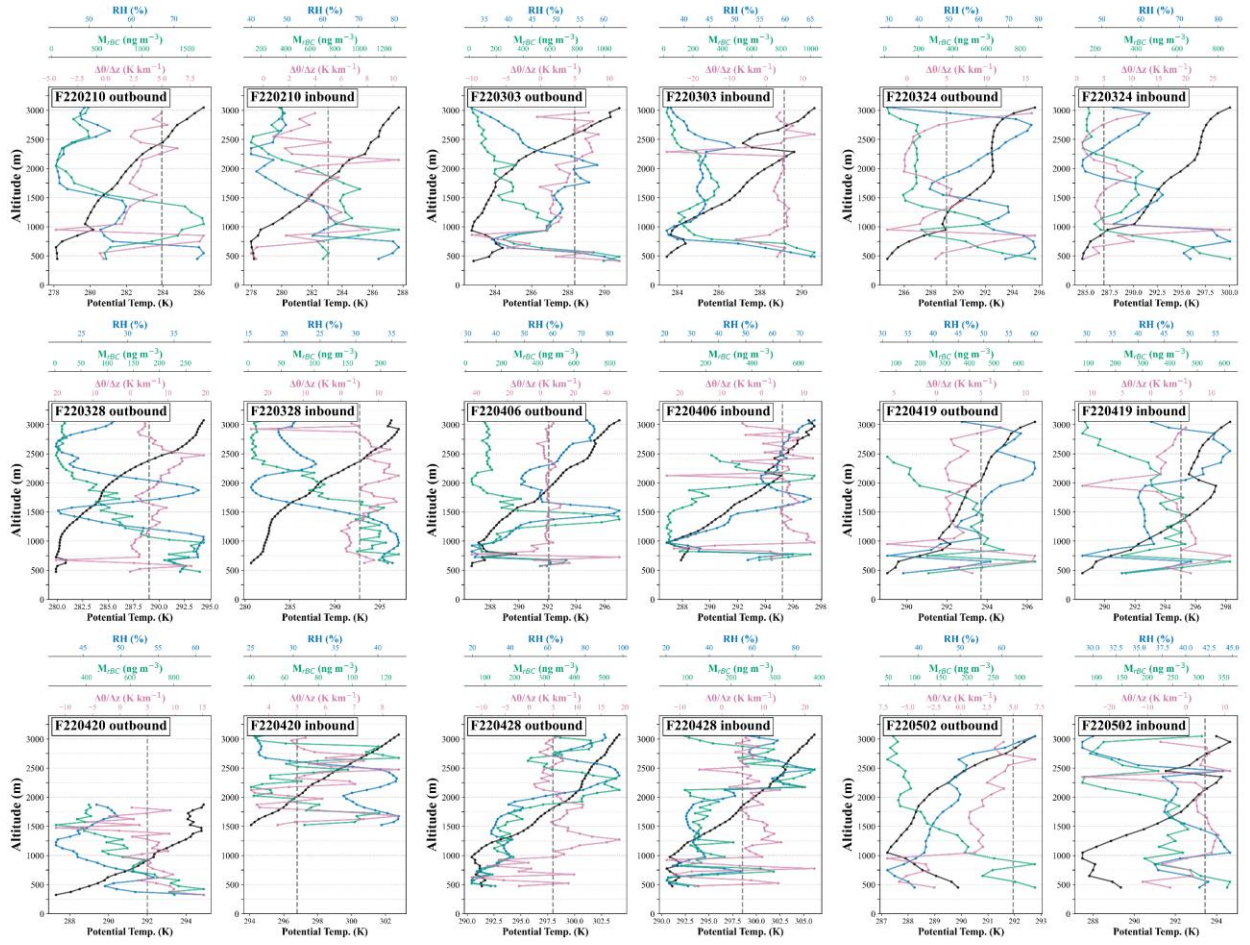

**Figure S2.** Vertical profiles of the vertical gradient of potential temperature ( $\Delta\theta/\Delta z$ ) [ $\text{K km}^{-1}$ ], Relative Humidity [%], Wind speed [ $\text{m s}^{-1}$ ], rBC mass concentration ( $M_{\text{rBC}}$ ) [ $\text{ng m}^{-3}$ ] for each flight during 2022. The vertical dotted black line shows  $\Delta\theta/\Delta z = 5 \text{ K km}^{-1}$ .

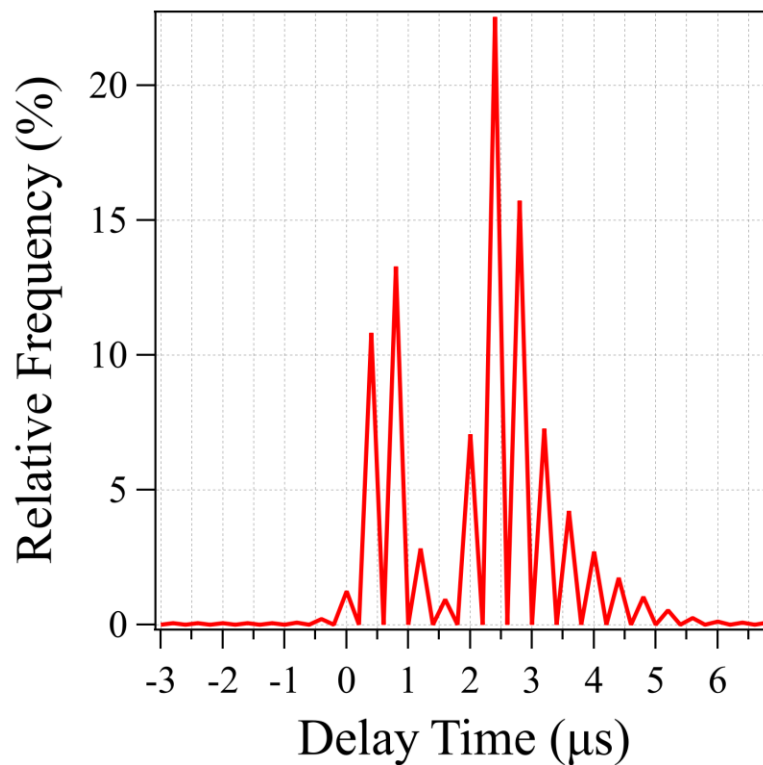

**Figure S3.** Distribution of delay time, defined as the difference between the incandescence and scattering channel signal peak times, for individual rBC particles observed during all flights over the Yellow Sea.

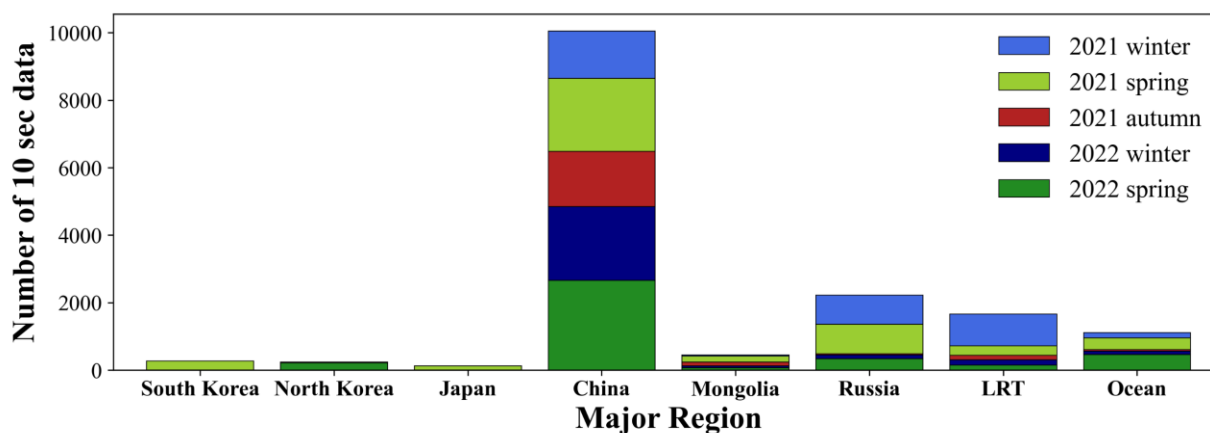

**Figure S4.** Number of 10-second data for each Major Region categorized. Major Regions include South Korea, North Korea, Japan, China, Mongolia, Russia, LRT, and Ocean. Seasonal classifications are as follows: Winter (Feb.–Mar.), Spring (Apr.–May), and Autumn (Oct.–Nov.).

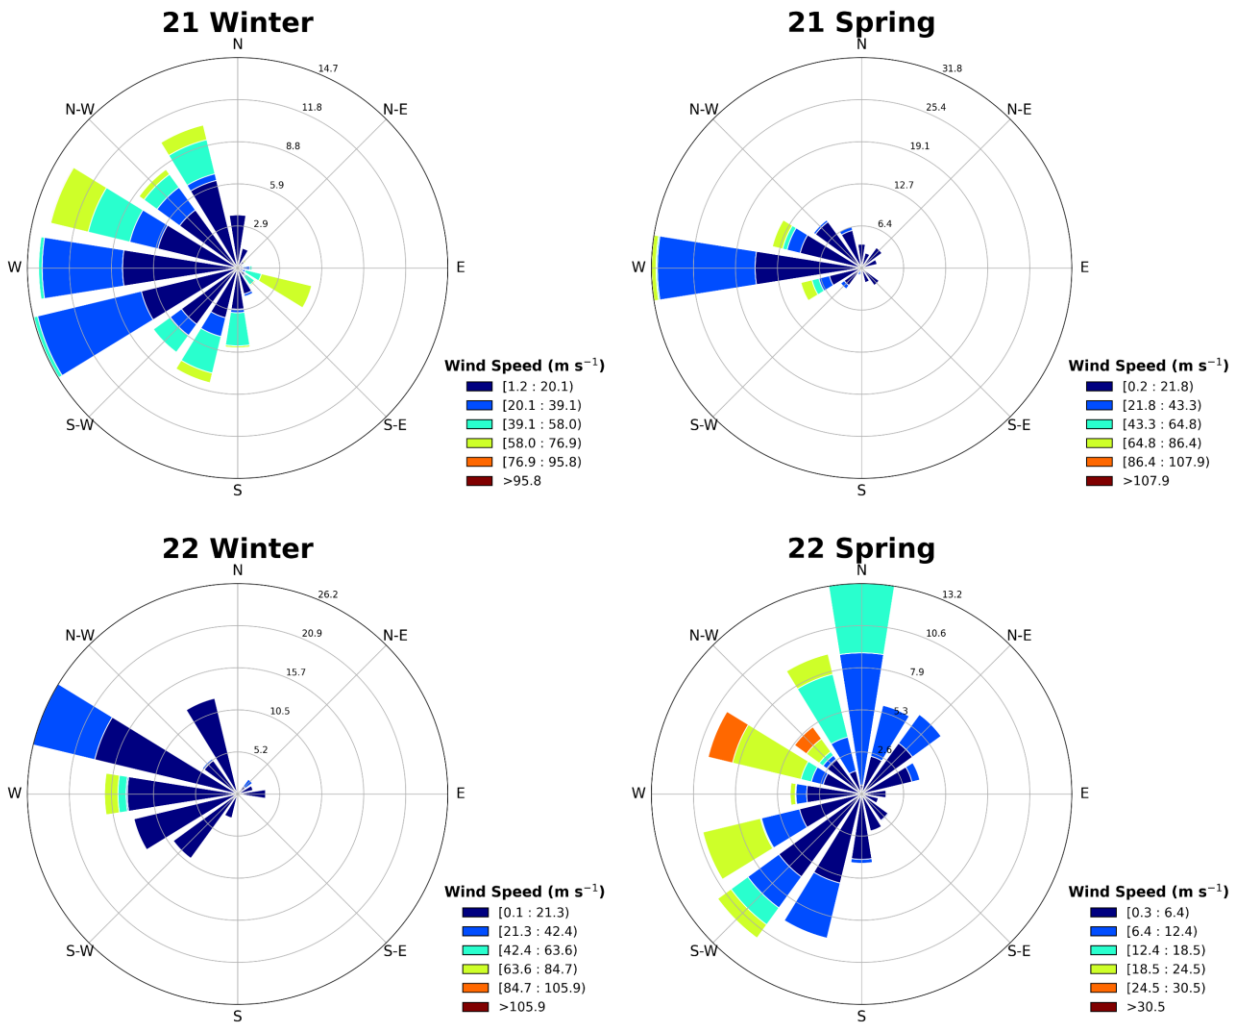

**Figure S5.** Seasonal wind rose plots showing wind direction and speed distributions for winter (February–March) and spring (April–May) flights in 2021 and 2022 over the Yellow Sea. Wind speed bins are color-coded, with ranges specific to each panel as indicated in the legends.



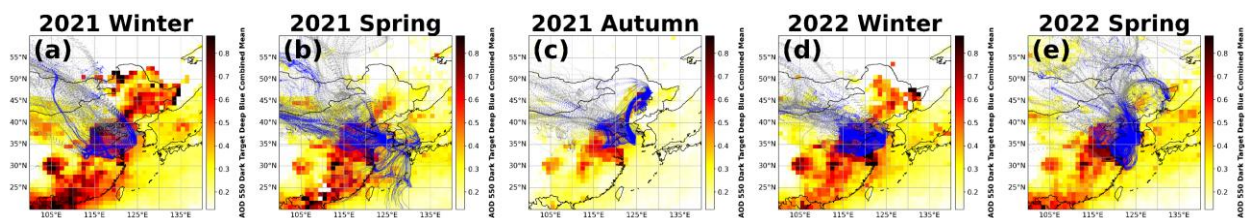

**Figure S6.** 5-day back trajectories and Aerosol Optical Depth (AOD): (a) 2021 Winter, (b) 2021 Spring, (c) 2021 Autumn, (d) 2022 Winter, and (e) 2022 Spring. Blue markers indicate trajectory points with altitudes below 2,500 m, and gray markers indicate points above 2,500 m. The map grid colors represent the 550 nm AOD from the Dark Target Deep Blue Combined Mean product (MODIS08 D3).

**Table S1.** Summary of airborne measurements including flight information and events captured during the flight missions conducted over the Yellow Sea from February 2021 to May 2022.

| Flight ID<br>(F+YYMMDD) | Latitude<br>(°N) | Longitude<br>(°E) | Altitude<br>(m asl.) | Flight time<br>(HH:MM) |             | Events*          |
|-------------------------|------------------|-------------------|----------------------|------------------------|-------------|------------------|
|                         |                  |                   |                      | Outbound               | Inbound     |                  |
| F210208                 | 34.8–37.5        | 124.2–126.5       | 442–4,794            | 13:04–14:35            | 14:35–15:27 |                  |
| F210219                 | 34.8–37.6        | 124.2–126.5       | 421–4,828            | 13:06–14:44            | 14:44–15:59 |                  |
| F210316                 | 34.8–37.6        | 124.2–126.5       | 477–4,965            | 11:58–13:10            | 13:10–14:36 |                  |
| F210323                 | 34.8–37.4        | 124.4–126.5       | 390–4,969            | 13:14–15:00            | 15:00–15:57 |                  |
| F210329                 | 34.8–37.6        | 124.4–126.5       | 457–4,858            | 13:09–14:56            | 14:57–15:33 | Asian dust       |
| F210414                 | 34.8–37.4        | 124.2–126.5       | 462–4,869            | 10:05–11:37            | 11:37–13:10 |                  |
| F210416                 | 36.0–37.5        | 124.2–126.5       | 299–4,889            | 14:08–15:37            | 15:37–16:52 |                  |
| F210428                 | 34.6–37.5        | 124.2–126.5       | 300–4,916            | 10:04–11:48            | 11:48–13:16 | Asian dust, Haze |
| F210429                 | 35.9–37.6        | 124.2–126.5       | 279–4,801            | 12:27–13:49            | 13:49–15:05 |                  |
| F210507                 | 36.0–37.6        | 124.2–126.5       | 320–4,875            | 13:05–14:40            | 14:40–15:56 | Asian dust       |
| F210513                 | 34.8–37.5        | 124.2–126.5       | 471–5,049            | 13:11–14:42            | 14:45–16:04 |                  |
| F211001                 | 34.8–37.4        | 124.2–126.5       | 477–5,025            | 10:07–11:36            | 11:36–12:57 |                  |
| F211102                 | 34.8–37.4        | 124.2–126.5       | 447–4,982            | 13:12–14:52            | 14:52–16:21 |                  |
| F211125                 | 34.8–37.5        | 124.2–126.5       | 455–4,843            | 12:11–13:40            | 13:40–15:04 |                  |
| F220210                 | 34.8–37.5        | 124.2–126.5       | 445–4,769            | 14:14–15:44            | 15:45–17:10 | Haze             |
| F220303                 | 34.8–37.5        | 124.2–126.4       | 438–4,821            | 10:13–11:48            | 11:48–13:05 | Asian dust, Haze |
| F220324                 | 34.8–37.4        | 124.2–126.5       | 460–4,912            | 10:28–12:08            | 12:09–13:24 | Haze             |
| F220328                 | 36.0–37.6        | 124.2–126.5       | 468–4,921            | 10:04–11:28            | 11:28–12:33 |                  |
| F220406                 | 34.8–37.5        | 124.2–126.5       | 548–4,954            | 10:05–11:38            | 11:38–12:38 |                  |
| F220419                 | 34.8–37.2        | 124.2–126.5       | 458–3,009            | 12:38–13:37            | 13:37–15:00 |                  |
| F220420                 | 36.0–37.4        | 124.2–126.5       | 290–4,624            | 12:49–13:57            | 13:58–14:44 |                  |
| F220428                 | 34.8–37.4        | 124.2–126.5       | 447–5,033            | 10:09–11:40            | 11:40–12:59 |                  |
| F220502                 | 34.8–37.5        | 124.2–126.5       | 468–4,836            | 12:59–14:27            | 14:27–16:03 |                  |

\* Event information is identified and provided by KMA (<https://www.weather.go.kr>).

**Table S2.** Summary of the planetary boundary layer height (PBLH), and entrainment zone (EZ) depth. PBLH and EZ depth are categorized into outbound and inbound flights.

|         | PBLH (m)         |         | EZ depth (m)   |         |
|---------|------------------|---------|----------------|---------|
|         | outbound         | inbound | outbound       | inbound |
| All     | -                | -       | -              | -       |
| F210208 | 1,500            | 1,450   | 400            | 1,250   |
| F210219 | 800              | 850     | 250            | 500     |
| F210316 | 500 (inbound)    |         | 700 (inbound)  |         |
| F210323 | 850 (outbound)   |         | 250 (outbound) |         |
| F210329 | 1,400 (outbound) |         | 300 (outbound) |         |
| F210414 | 750              | 750     | 225            | 375     |
| F210416 | 1,350            | 1,200   | 450            | 750     |
| F210428 | 300              | 300     | 50             | 500     |
| F210429 | 350              | 300     | 150            | 600     |
| F210507 | 675              | 900     | 450            | 900     |
| F210513 | 400              | 1,000   | 200            | 400     |
| F211001 | 800              | 950     | 150            | 250     |
| F211102 | 1,300            | 1,250   | 450            | 500     |
| F211125 | 1,350            | 1,275   | 300            | 975     |
| F220210 | 700              | 900     | 200            | 200     |
| F220303 | 525              | 600     | 75             | 75      |
| F220324 | 600              | 700     | 300            | 400     |
| F220328 | 1,200            | 1,350   | 450            | 1,500   |
| F220406 | 1,500            | 1,600   | 150            | 500     |
| F220419 | 600              | 600     | 200            | 900     |
| F220420 | 300 (outbound)   |         | 250 (outbound) |         |
| F220428 | 950              | 950     | 600            | 800     |
| F220502 | 975 (inbound)    |         | 750 (inbound)  |         |

**Table S3.** Number of 10-second data points for each major region categorized by season. Major Regions include South Korea, North Korea, Japan, China, Mongolia, Russia, LRT, and Ocean. Seasonal classifications are as follows: Winter (Feb.–Mar.), Spring (Apr.–May), and Autumn (Oct.–Nov.). The total number of data points for each region is also presented.

|              | 2021<br>Winter | 2021<br>Spring | 2021<br>Autumn | 2022<br>Winter | 2022<br>Spring | Sum    |
|--------------|----------------|----------------|----------------|----------------|----------------|--------|
| South Korea* | 0              | 273            | 0              | 0              | 0              | 273    |
| North Korea* | 1              | 3              | 10             | 10             | 213            | 237    |
| Japan*       | 0              | 122            | 0              | 0              | 0              | 122    |
| China        | 1,402          | 2,161          | 1,640          | 2,184          | 2,663          | 10,050 |
| Mongolia     | 41             | 180            | 113            | 55             | 66             | 455    |
| Russia       | 865            | 880            | 29             | 110            | 342            | 2,226  |
| LRT          | 943            | 278            | 136            | 150            | 150            | 1,657  |
| Ocean        | 158            | 354            | 45             | 97             | 462            | 1,116  |
| Sum          | 3,410          | 4,251          | 1,973          | 2,606          | 3,896          | 16,136 |

\*Most data (more than 90% of each Major Region data) are concentrated in a specific season.

**Table S4.** Total BC emissions (Gg) from the EDGAR v8.1 inventory for South Korea, North Korea, Japan, China, Mongolia, and Russia. Seasonal classifications are as follows: Winter (Feb.–Mar.), Spring (Apr.–May), and Autumn (Oct.–Nov.).

|             | BC emission (Gg) |           |           |           |           |
|-------------|------------------|-----------|-----------|-----------|-----------|
|             | 21 Winter        | 21 Spring | 21 Autumn | 22 Winter | 22 Spring |
| South Korea | 2.4              | 2.2       | 2.3       | 2.5       | 2.1       |
| North Korea | 1.9              | 1.3       | 1.6       | 1.9       | 1.3       |
| Japan       | 4.7              | 4.0       | 4.1       | 4.9       | 4.0       |
| China       | 181.9            | 169.9     | 190.5     | 188.6     | 168.9     |
| Mongolia    | 0.4              | 0.3       | 0.4       | 0.4       | 0.3       |
| Russia      | 9.8              | 9.3       | 10.9      | 9.8       | 9.6       |



**Table S5.** Slopes for rBC/CO and CO/CO<sub>2</sub> in each Major Region and the corresponding BC/CO, CO/CO<sub>2</sub> ratios from the EDGAR v8.1 emission inventory. Values in parentheses indicate R<sup>2</sup>.

|             | BC/CO<br>(ng m <sup>-3</sup> ppbv <sup>-1</sup> ) |                    | CO/CO <sub>2</sub><br>(ppmv ppmv <sup>-1</sup> %) |                    |
|-------------|---------------------------------------------------|--------------------|---------------------------------------------------|--------------------|
|             | This study                                        | Emission inventory | This study                                        | Emission inventory |
| South Korea | 0.67(0.87)                                        | 5.97               | 2.44(0.98)                                        | 0.67               |
| North Korea | 3.82(0.70)                                        | 8.81               | 0.54(0.46)                                        | 3.37               |
| Japan       | 1.11(0.93)                                        | 6.83               | 2.40(0.99)                                        | 0.63               |
| China       | 2.43(0.63)                                        | 10.96              | 1.33(0.69)                                        | 1.37               |
| Mongolia    | 1.41(0.79)                                        | 14.89              | 1.82(0.91)                                        | 1.12               |
| Russia      | 0.98(0.34)                                        | 5.10               | 1.55(0.75)                                        | 1.09               |
